# Supplementary material for: An improved interolog mapping-based computational prediction of protein–protein interactions with increased network coverage
Source: Royal Society of Chemistry journal article supplement (doi:10.1039/c4ib00136b), 2014-01-01
Supplement: c4ib00136b1.pdf [file c4ib00136b1.pdf]

## Supplementary Material

**Table S1:** Public databases used for predicting and validation of the interactions

| Database              | Proteins  | Interactions |
|-----------------------|-----------|--------------|
| DIP(*) <sup>54</sup>  | 23,680    | 70,630       |
| String <sup>55</sup>  | 5,214,234 | 673,123,356  |
| Intact <sup>56</sup>  | 60,846    | 314,019      |
| Psibase <sup>57</sup> | 105,725   | 60,532       |

(\*) The gold standard data used to validation. Note: Because interactions in the String database are represented both in the A -> B and B -> A directions, there are only 336,561,678 distinct interactions.
