# Supplementary material for: An improved interolog mapping-based computational prediction of protein–protein interactions with increased network coverage
Source: Royal Society of Chemistry journal article supplement (doi:10.1039/c4ib00136b), 2014-01-01
Supplement: c4ib00136b3.pdf [file c4ib00136b3.pdf]

## Supplementary Material

**Table S3:** Distribution of Blast+ alignments grouped by number of hits. Number of reciprocal hits returned by Blast+ but counted in only one direction. (\*) Alignments in which the coverage to identity ratio is above 80%. All: sum of String, Psibase and Intact. Blast Total: equal to All multiplied by Hits, adding up to 812,907 Blast+ hits in one direction or 1,625,814 if reciprocal hits are counted. Contribution: number of distinct identifiers found in alignments with x number of hits, also considering that these identifiers are not found in the sets of identifiers found with x-1 or less hits.

| Hits       | Blast1 | String | Intact | Psibase | All            | All(*)         | Contribution(*) | Blast Total |
|------------|--------|--------|--------|---------|----------------|----------------|-----------------|-------------|
| 20         |        | 19,229 | 4,592  | 5398    | 29,219(0.718%) | 4,169(0.414%)  | 326(0.0140%)    | 584,380     |
| 19         |        | 486    | 732    | 212     | 1,430(0.033%)  | 135(0.012%)    | 14(0.0006%)     | 27,170      |
| 18         |        | 228    | 570    | 197     | 995(0.022%)    | 150(0.013%)    | 14(0.0006%)     | 17,910      |
| 17         |        | 169    | 585    | 192     | 946(0.019%)    | 166(0.014%)    | 16(0.0006%)     | 16,082      |
| 16         |        | 160    | 538    | 273     | 971(0.019%)    | 220(0.017%)    | 16(0.0006%)     | 15,536      |
| 15         |        | 175    | 509    | 197     | 881(0.016%)    | 253(0.018%)    | 26(0.0011%)     | 13,215      |
| 14         |        | 146    | 574    | 222     | 942(0.016%)    | 333(0.023%)    | 36(0.0015%)     | 13,188      |
| 13         |        | 174    | 565    | 223     | 962(0.015%)    | 357(0.023%)    | 42(0.0018%)     | 12,506      |
| 12         |        | 161    | 588    | 272     | 1,021(0.015%)  | 378(0.022%)    | 60(0.0025%)     | 12,252      |
| 11         |        | 168    | 629    | 256     | 1,053(0.014%)  | 365(0.019%)    | 44(0.0018%)     | 11,583      |
| 10         |        | 175    | 616    | 336     | 1,127(0.013%)  | 375(0.018%)    | 38(0.0016%)     | 11,270      |
| 9          |        | 163    | 725    | 294     | 1,182(0.013%)  | 347(0.015%)    | 73(0.0031%)     | 10,638      |
| 8          |        | 244    | 788    | 407     | 1,439(0.014%)  | 954(0.037%)    | 540(0.0231%)    | 11,512      |
| 7          |        | 365    | 891    | 344     | 1,600(0.013%)  | 1,501(0.052%)  | 163(0.0070%)    | 11,200      |
| 6          |        | 319    | 1,068  | 437     | 1,824(0.013%)  | 835(0.024%)    | 154(0.0066%)    | 10,944      |
| 5          |        | 244    | 1,079  | 401     | 1,724(0.010%)  | 1,167(0.029%)  | 238(0.0102%)    | 8,620       |
| 4          |        | 187    | 1,250  | 604     | 2,041(0.010%)  | 1,735(0.034%)  | 439(0.0188%)    | 8,164       |
| 3          |        | 99     | 1,471  | 522     | 2,092(0.007%)  | 2,110(0.031%)  | 783(0.0336%)    | 6,276       |
| 2          |        | 116    | 1,843  | 828     | 2,787(0.006%)  | 5,418(0.053%)  | 3,413(0.1036%)  | 5,574       |
| 1          | 47,949 | 420    | 3,474  | 993     | 4,887(0.006%)  | 24,371(0.121%) | 17,845(0.7665%) | 4,887       |
| Total hits |        |        |        |         |                | 200,970        | 23,280(0.98%)   | 812,907     |
