# Supplementary material for: An improved interolog mapping-based computational prediction of protein–protein interactions with increased network coverage
Source: Royal Society of Chemistry journal article supplement (doi:10.1039/c4ib00136b), 2014-01-01

## Supplementary Material

**Figure S4:** ROC curves corresponding to the metrics generated with the Blast+ parameter num\_alignments set to 1. Conserved uses the metric  $\text{Conserved}/100 * \text{Coverage}/100$ . Identity uses the metric  $\text{Identity}/100 * \text{Coverage}/100$ . Combined I uses the metric  $\text{pDB score} * \text{qt\_pDB}$ . Combined II uses the metrics  $\text{pDB score} * \text{qt\_pDB}$  for String and  $\text{pDB score} * 3$  for Intact.

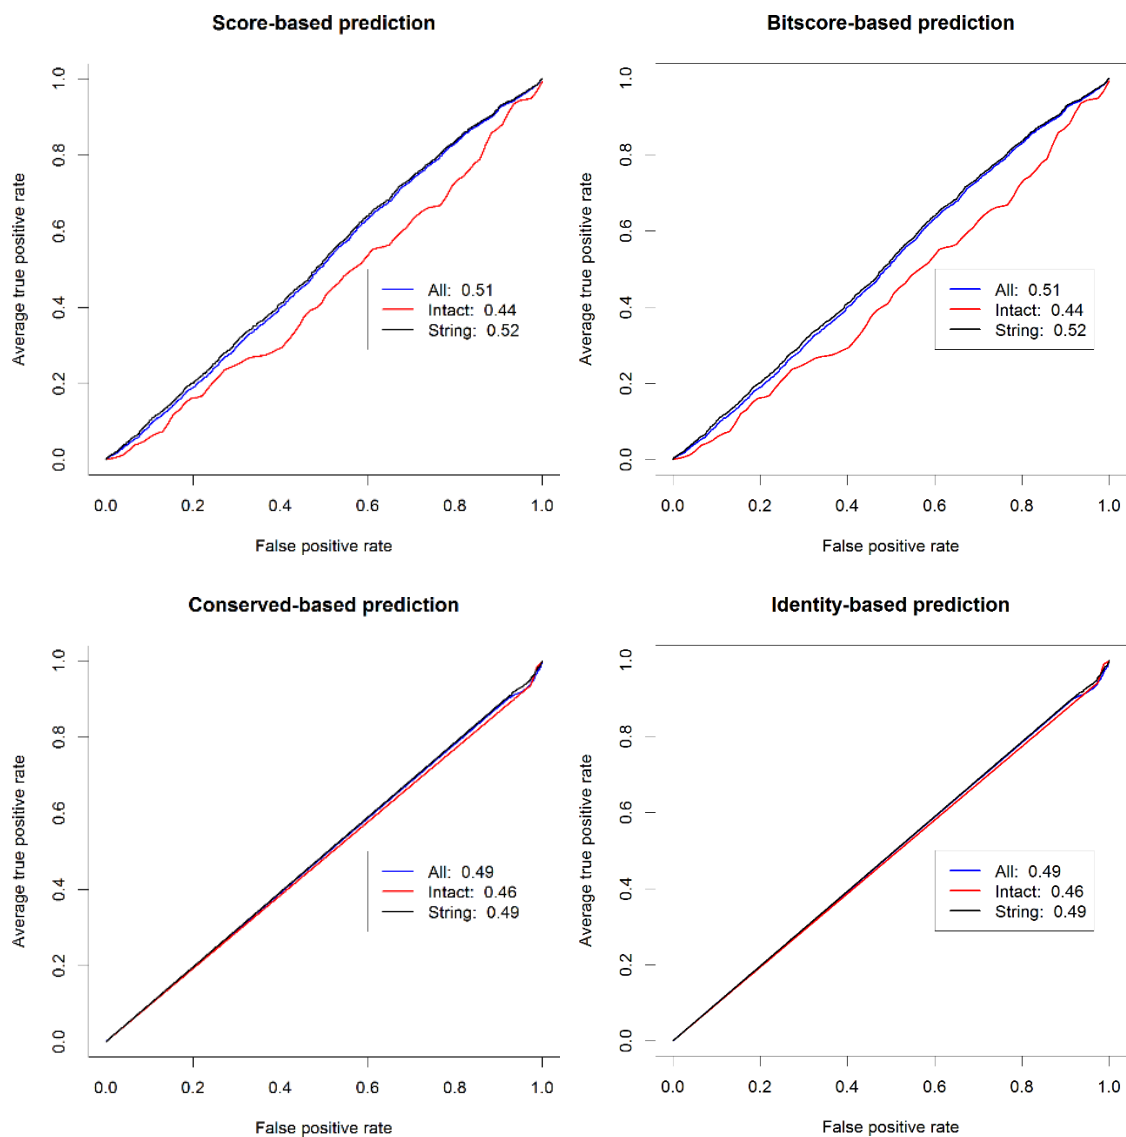

**Expected-based prediction**

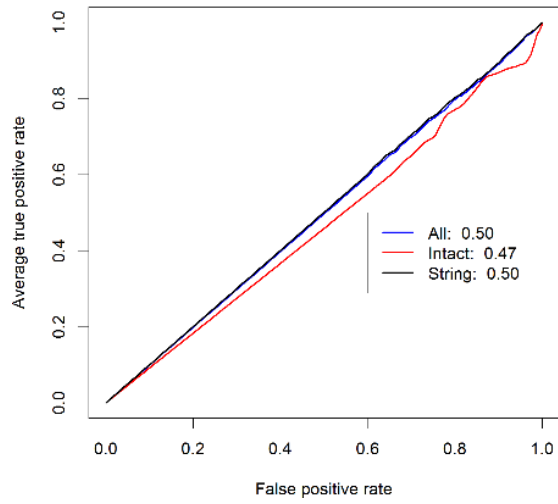

**pDB score-based prediction**

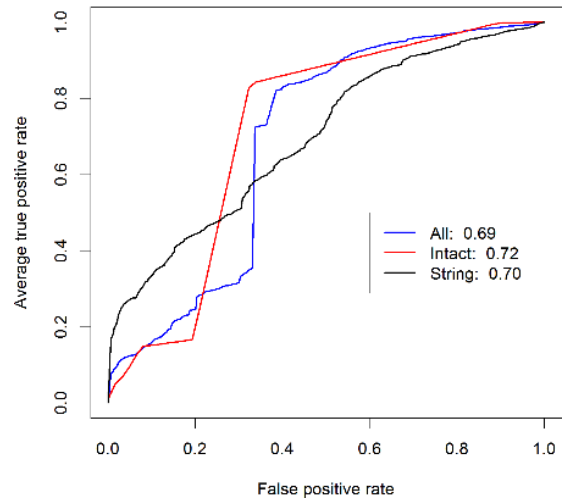

**Combined I prediction**

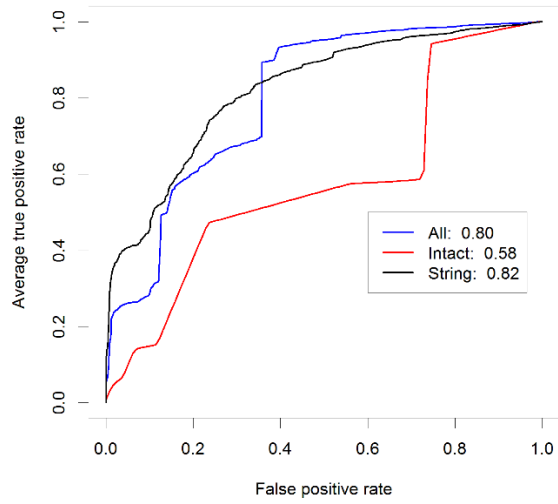

**Combined II prediction**

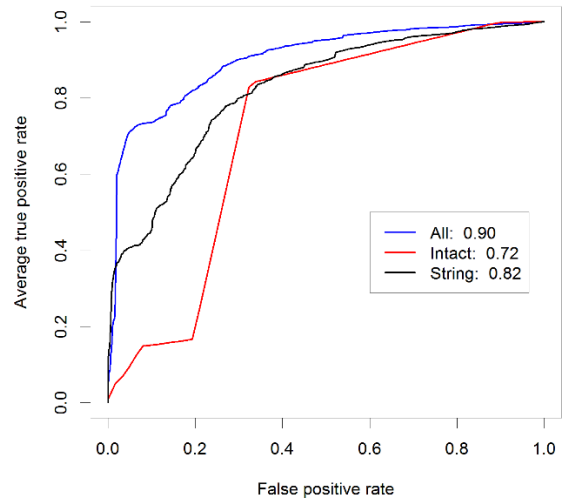

Supplement: c4ib00136b4.pdf [file c4ib00136b4.pdf]
