# Supplementary material for: An improved interolog mapping-based computational prediction of protein–protein interactions with increased network coverage
Source: Royal Society of Chemistry journal article supplement (doi:10.1039/c4ib00136b), 2014-01-01

## Supplementary Material

**Figure S5:** ROC curves corresponding to the metrics generated with the Blast+ parameter num\_alignments set to 20 and average interaction pair metric value (avg(ab)). Conserved uses the metric  $\text{Conserved}/100 * \text{Coverage}/100$ . Identity uses the metric  $\text{Identity}/100 * \text{Coverage}/100$ . Combined I uses the metric  $\text{pDB score} * \text{qt\_pDB}$ . Combined II uses the metric  $\text{pc\_identity}/100 * \text{pc\_coverage}/100$  for the Intact pDB and the metric  $\text{pc\_identity}/100 * \text{pc\_coverage}/100 * \text{qt\_pDB}/2$  for the String and Psibase pDBs.

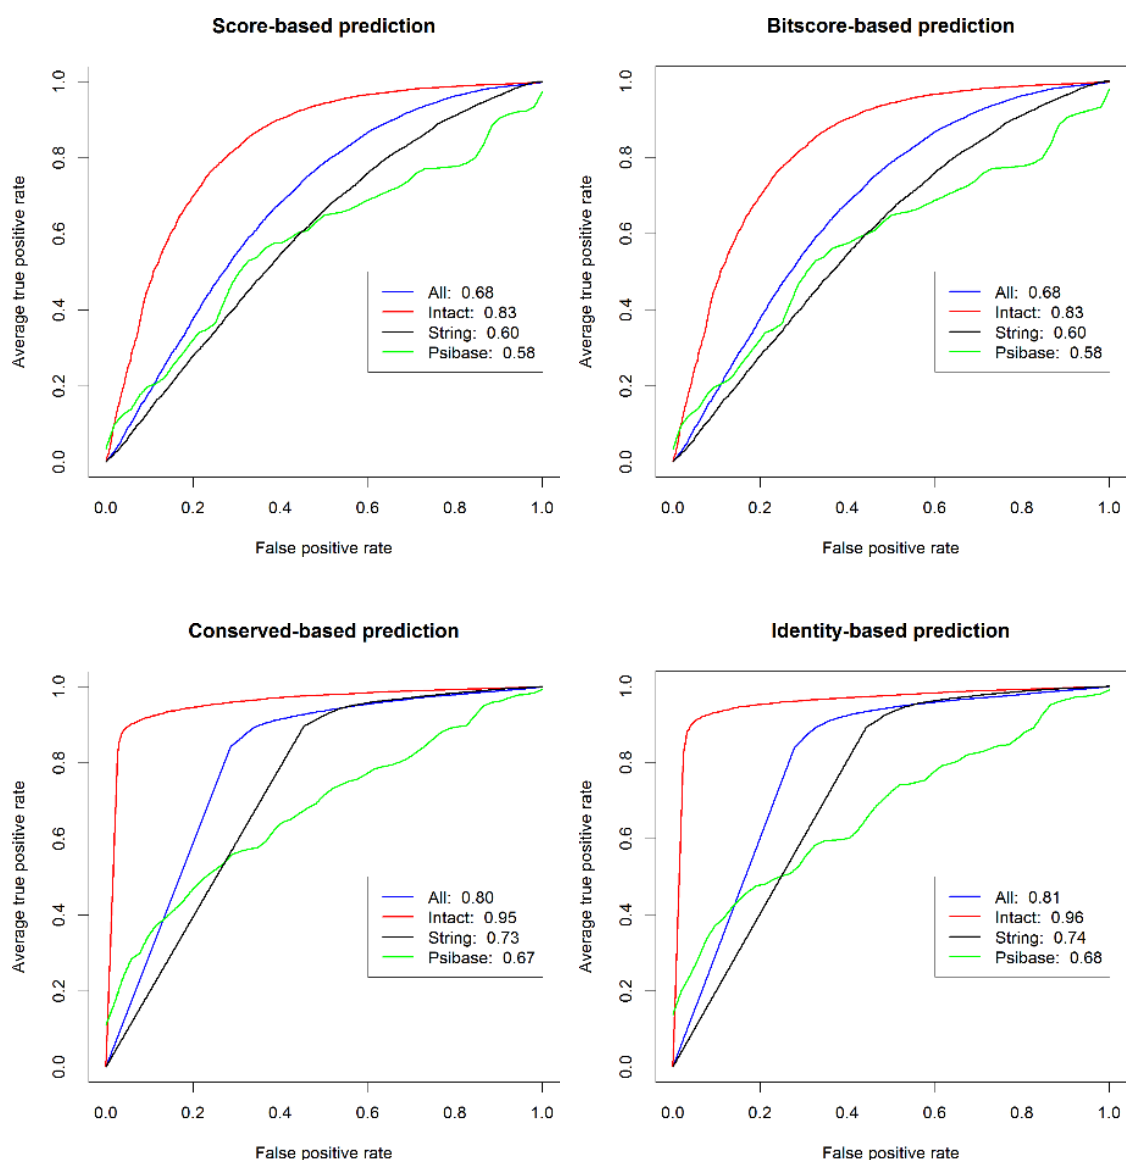

**Expected-based prediction**

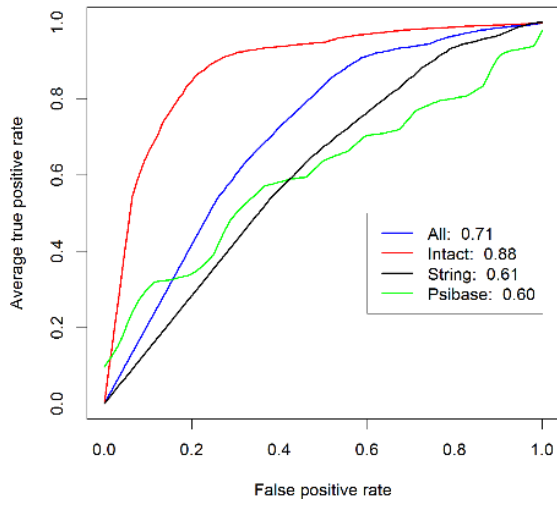

**pDB score-based prediction**

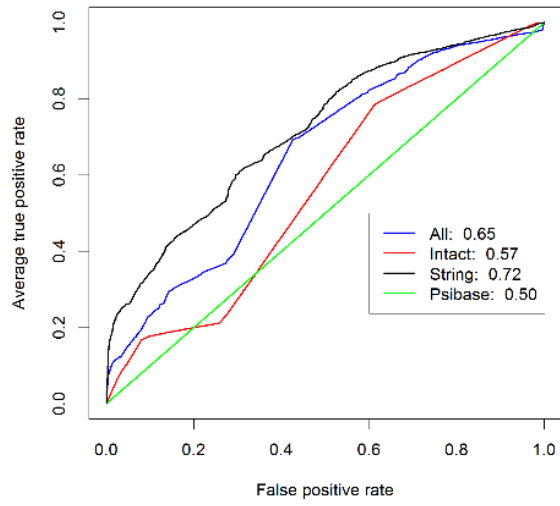

**Combined I prediction**

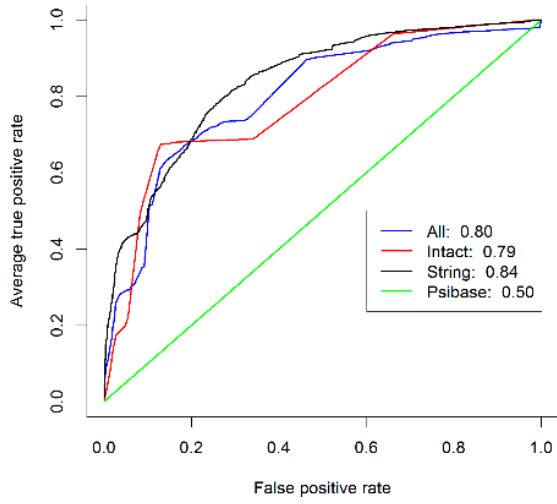

**Combined II prediction**

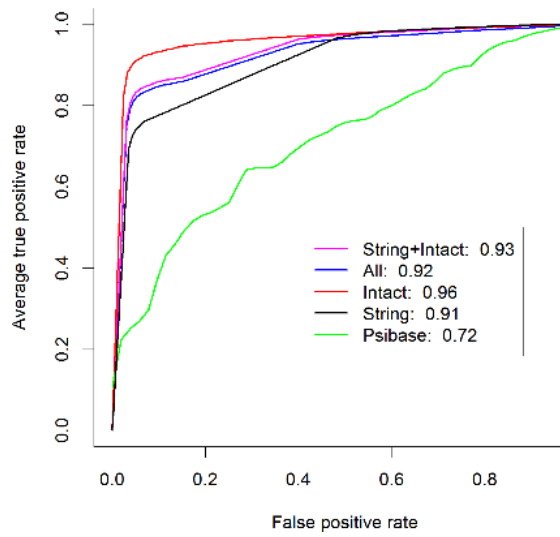

Supplement: c4ib00136b5.pdf [file c4ib00136b5.pdf]
